# Supplementary material for: Mussel-inspired conductive Ti2C-cryogel promotes functional maturation of cardiomyocytes and enhances repair of myocardial infarction
Source: Theranostics. 2020 Jan 12;10(5):2047–66. doi: 10.7150/thno.38876 (PMC7019164; doi:10.7150/thno.38876)
Supplement: Supplementary file 1 — Supplementary figures. [file thnov10p2047s1.pdf]

**Mussel-inspired conductive Ti<sub>2</sub>C-cryogel promotes functional  
maturation of cardiomyocytes and enhances repair of myocardial  
infarction**

**Genlan Ye<sup>1,3#</sup>, Zubiao Wen<sup>2#</sup>, Feng Wen<sup>1</sup>, Xiaoping Song<sup>1</sup>, Leyu Wang<sup>1</sup>,  
Chuangkun Li<sup>1</sup>, Yutong He<sup>1,3</sup>, Sugandha Prakash<sup>1</sup>, Xiaozhong Qiu<sup>1\*</sup>**

<sup>1</sup>Guangdong Provincial Key Laboratory of Construction and Detection in Tissue Engineering, School of Basic Medical Science; Biomaterials Research Center, School of Biomedical Engineering, Southern Medical University, Guangdong, Guangzhou 510515, China

<sup>2</sup>College of Chemistry and Chemical Engineering, Jiangxi Normal University, Nanchang 330022, China

<sup>3</sup>Guangzhou Regenerative Medicine and Health Guangdong Laboratory, Guangzhou 510005, China

**# These authors contributed equally to this work.**

**\*Corresponding author:**

Prof. Xiaozhong Qiu

Guangdong Provincial Key Laboratory of Construction and Detection in Tissue Engineering, School of Basic Medical Science, Southern Medical University, Guangdong, Guangzhou 510515, China

Email address: qqiuxzh@163.com

Telephone number: 86-20-61648401

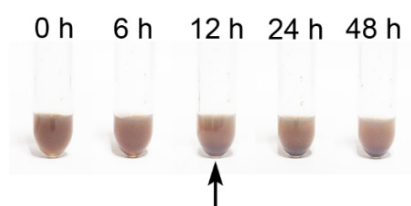

**Figure S1. Graphene-cryogel prepolymer solutions rest for different times.**

Arrow showed aggregation occurred in 12 hours.

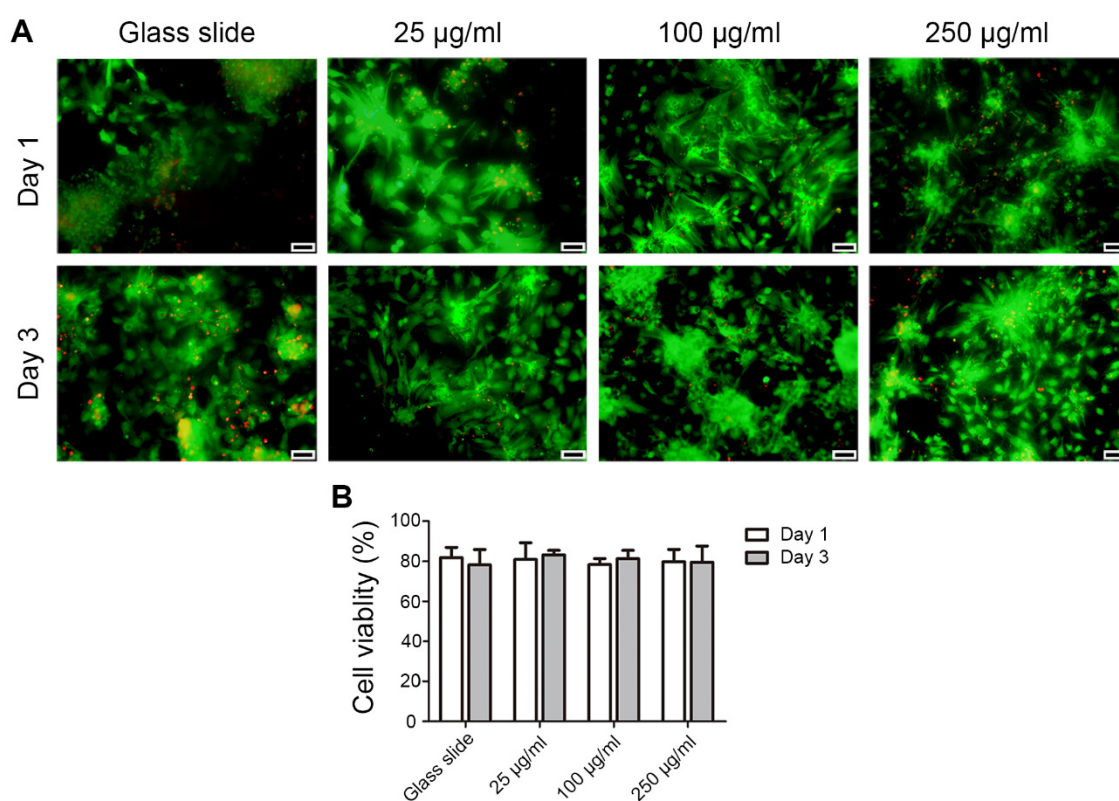

**Figure S2. Biocompatibility of the MXene  $Ti_2C$  nanoparticles.** A) Live-dead staining for neonatal rat CMs treated with various concentrations of  $Ti_2C$  nanoparticles on day 1 and day 3 of treatment. B) Quantitative cell viability of CMs based on the live-dead staining. Green cells represented live cells and red cells represented dead cells. Scale bars = 50  $\mu m$ .

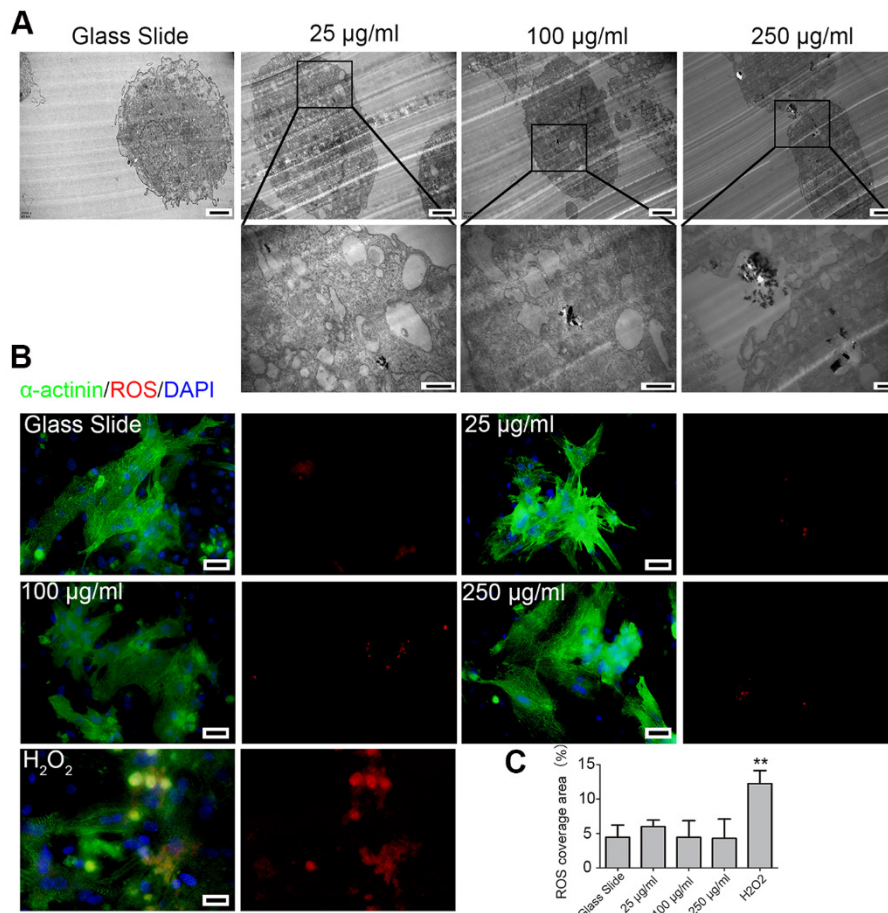

**Figure S3. A few of  $\text{Ti}_2\text{C}$  nanoparticles invaginated into the CMs and did not elevate the cellular ROS levels.** A) TEM of the CMs treated with different concentrations of  $\text{Ti}_2\text{C}$  nanoparticles. B) Fluorescence images of the ROS in CMs treated with a different concentration of  $\text{Ti}_2\text{C}$  nanoparticles. C) The quantification of the ROS level.

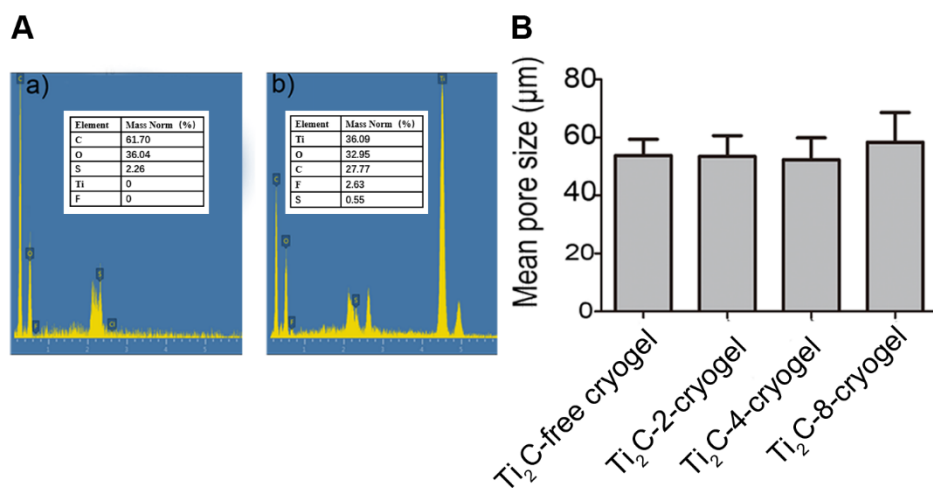

**Figure S4. The characteristic of the Ti<sub>2</sub>C cryogel.** A) Element mass analysis of Ti<sub>2</sub>C-free cryogel and Ti<sub>2</sub>C-8-cryogel using energy-dispersive X-ray spectroscopy analysis. B) Mean pore sizes of different cryogels.

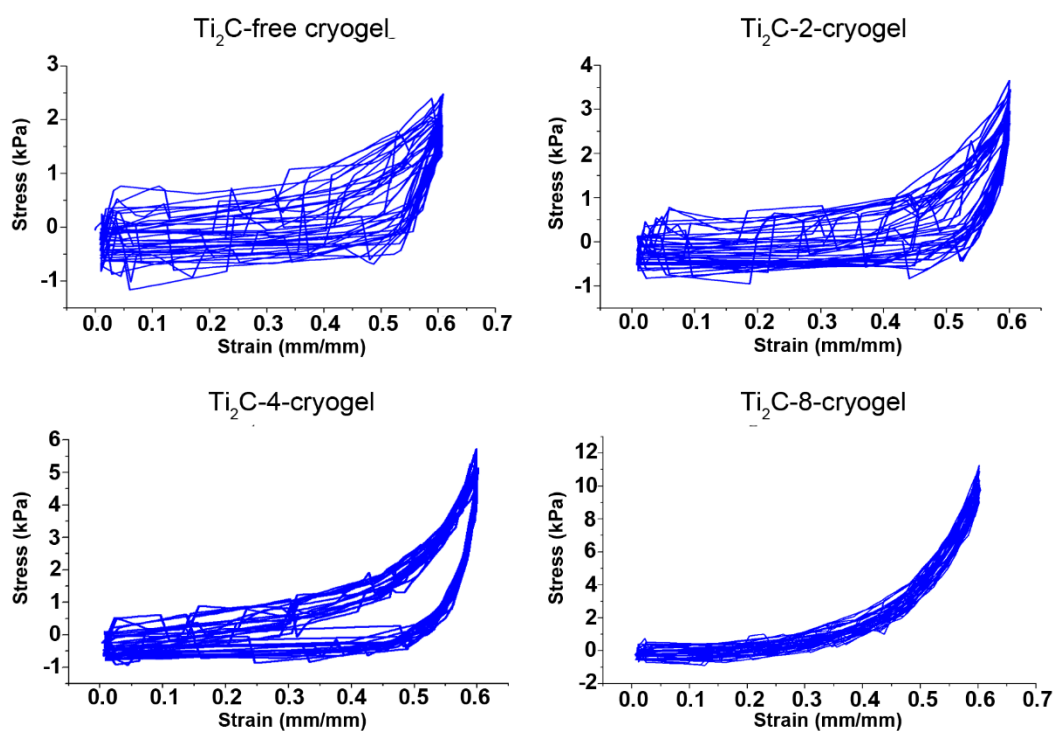

**Figure S5. The stress-strain curve of different cryogels in compressive cycling test up to 60 % deformation for the first 20 cycles.**

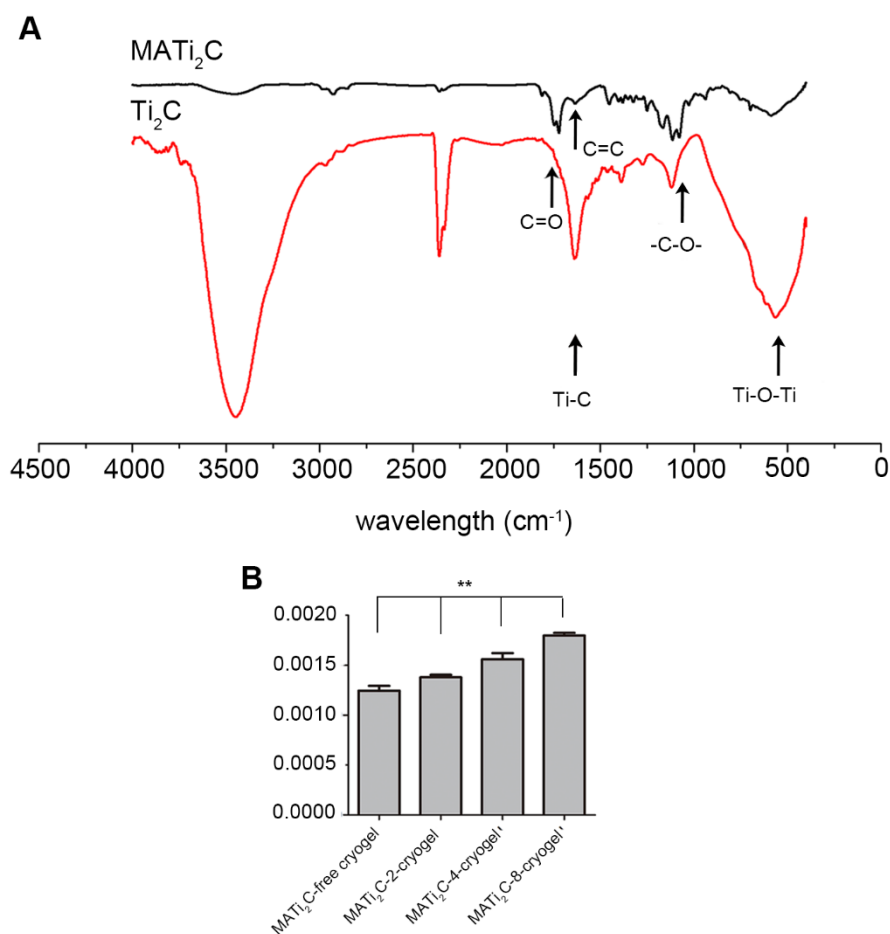

**Figure S6. Characterization of MATi<sub>2</sub>C and MATi<sub>2</sub>C-cryogel.** A) FTIR spectrum of MATi<sub>2</sub>C and Ti<sub>2</sub>C nanoparticles B) Conductivities of different MATi<sub>2</sub>C-cryogels detected via four points probe method. n = 3. \*\* $p < 0.01$

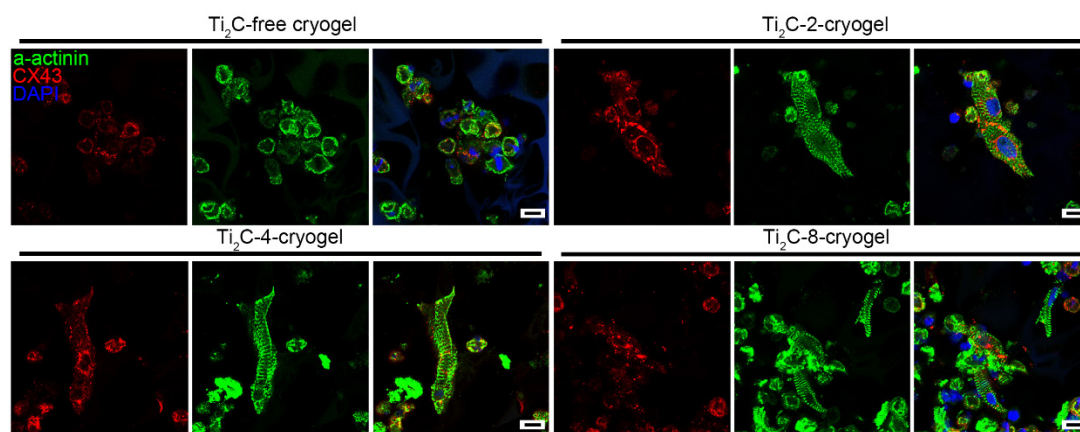

**Figure S7. Immunofluorescent staining for cardiac-specific protein  $\alpha$ -actinin (green) and CX43 (red) in CMs cultured on different  $\text{Ti}_2\text{C}$ -cryogels on day 3. Scale bars =10  $\mu\text{m}$ .**

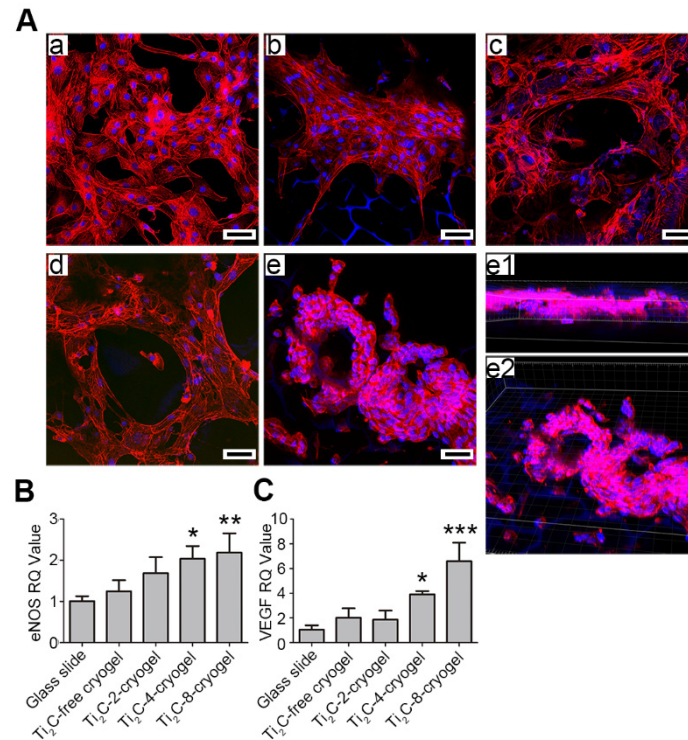

**Figure S8. Ti<sub>2</sub>C-cryogel promoted the tube formation of RAEC *in vitro*.** A) F-actin showed the cell morphology of RAEC cultured on a glass slide or other different cryogels. 3D tube structure of RAEC formatted in Ti<sub>2</sub>C-8-cryogels (a, glass slide, b, Ti<sub>2</sub>C-free cryogel, c, Ti<sub>2</sub>C-2-cryogel, d, Ti<sub>2</sub>C-4-cryogel, e, Ti<sub>2</sub>C-8-cryogel). B) and C) Expression of eNOS and VEGF genes in RAEC on a glass slide or other different cryogels. Scale bars=50 μm. n=3 \**p*<0.05, \*\**p*<0.01, \*\*\**p*<0.001

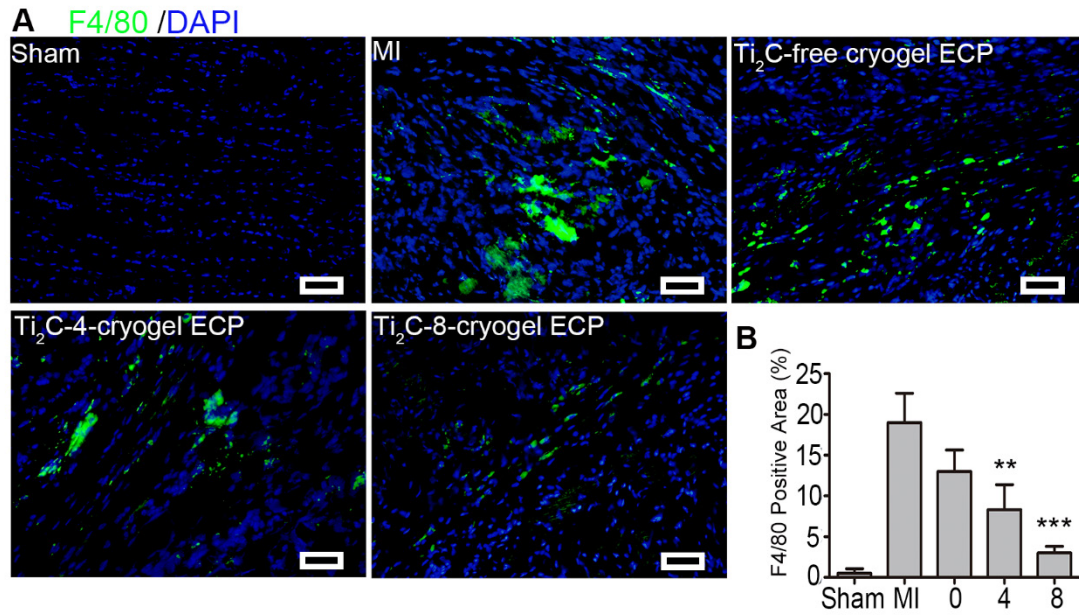

**Figure S9. Inflammation of infarcted area after ECPs transplantation.** A) F4/80 immunostaining in the infarcted area in different groups. B) F4/80-positive area in different groups.  $n = 3$ . \*\* $p < 0.01$ , \*\*\* $p < 0.001$

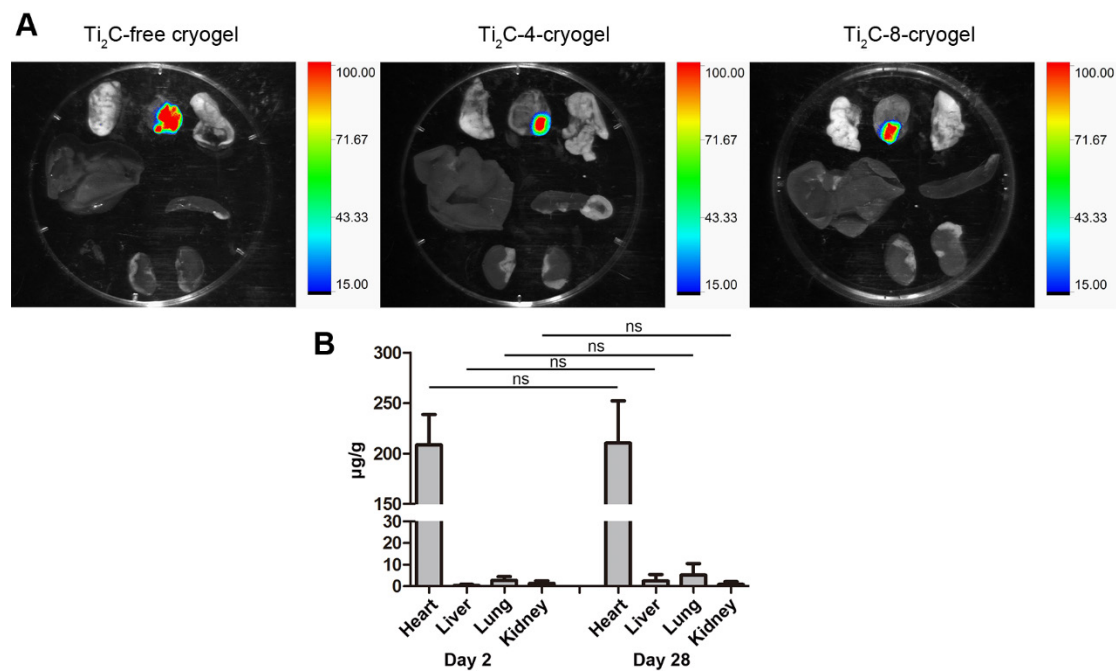

**Figure S10.** The location of the cryogel in rats and distribution of the  $\text{Ti}_2\text{C}$  nanoparticles in different organs in 28 days after transplantation. A) Fluorescence signals of cy5-labeled cryogels detected by a fluorescence imaging system. B) The total titanium content in different organs measured in 2 and 28 days after ECPs transplantation.

Supplemental movie 1. The compress and the release of the Ti<sub>2</sub>C-8-cryogel;

Supplemental movie 2. The calcium transient in CMs cultured on different ECPs for 3 days;

Supplemental movie 3. The synchronous contraction of different ECPs *in vitro* on day 7 under the microscope;

Supplemental movie 4. The synchronous contraction of Ti<sub>2</sub>C-8-cryogel ECP *in vitro* on day 7 observed by naked eyes.

Supplemental movie 5. The short-axis B model echo video of the ECP transplantation group.
